# Supplementary material for: Single-cell analysis of human nasal mucosal IgE antibody secreting cells reveals a newly minted phenotype
Source: PubMed Central journal article supplement — Mucosal Immunol. Author manuscript; Available in PMC 2024 Jul 7. (PMC11227847; doi:10.1016/j.mucimm.2023.02.008), 2023-03-15

# Supplementary Figure 1

**A**

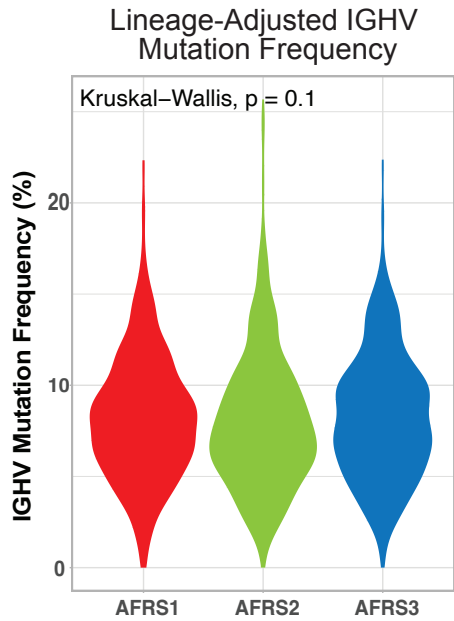

**B**

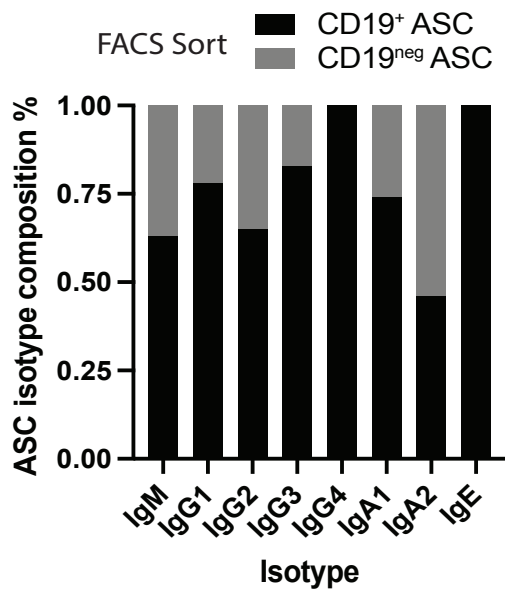

**C**

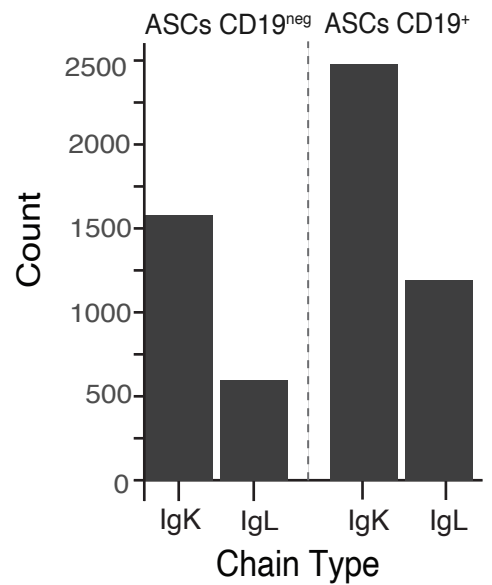

**D**

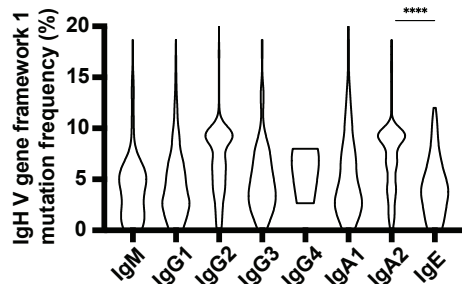

**E**

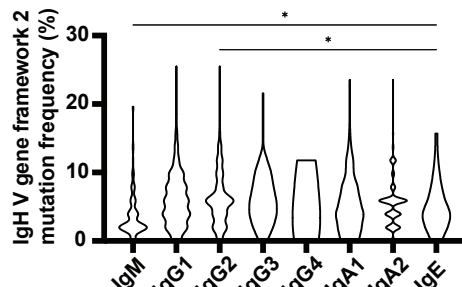

**F**

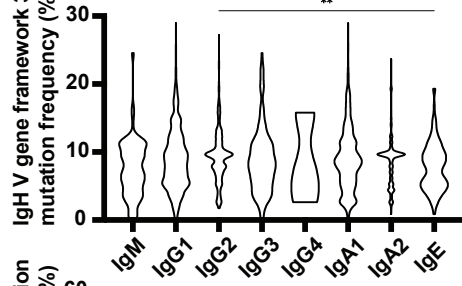

**G**

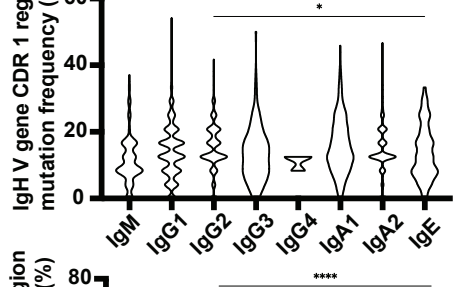

**H**

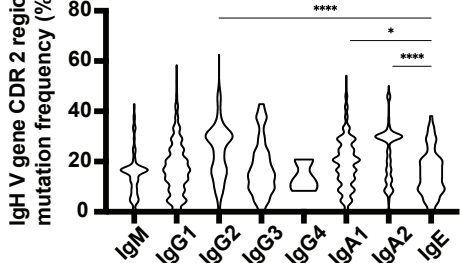

**I**

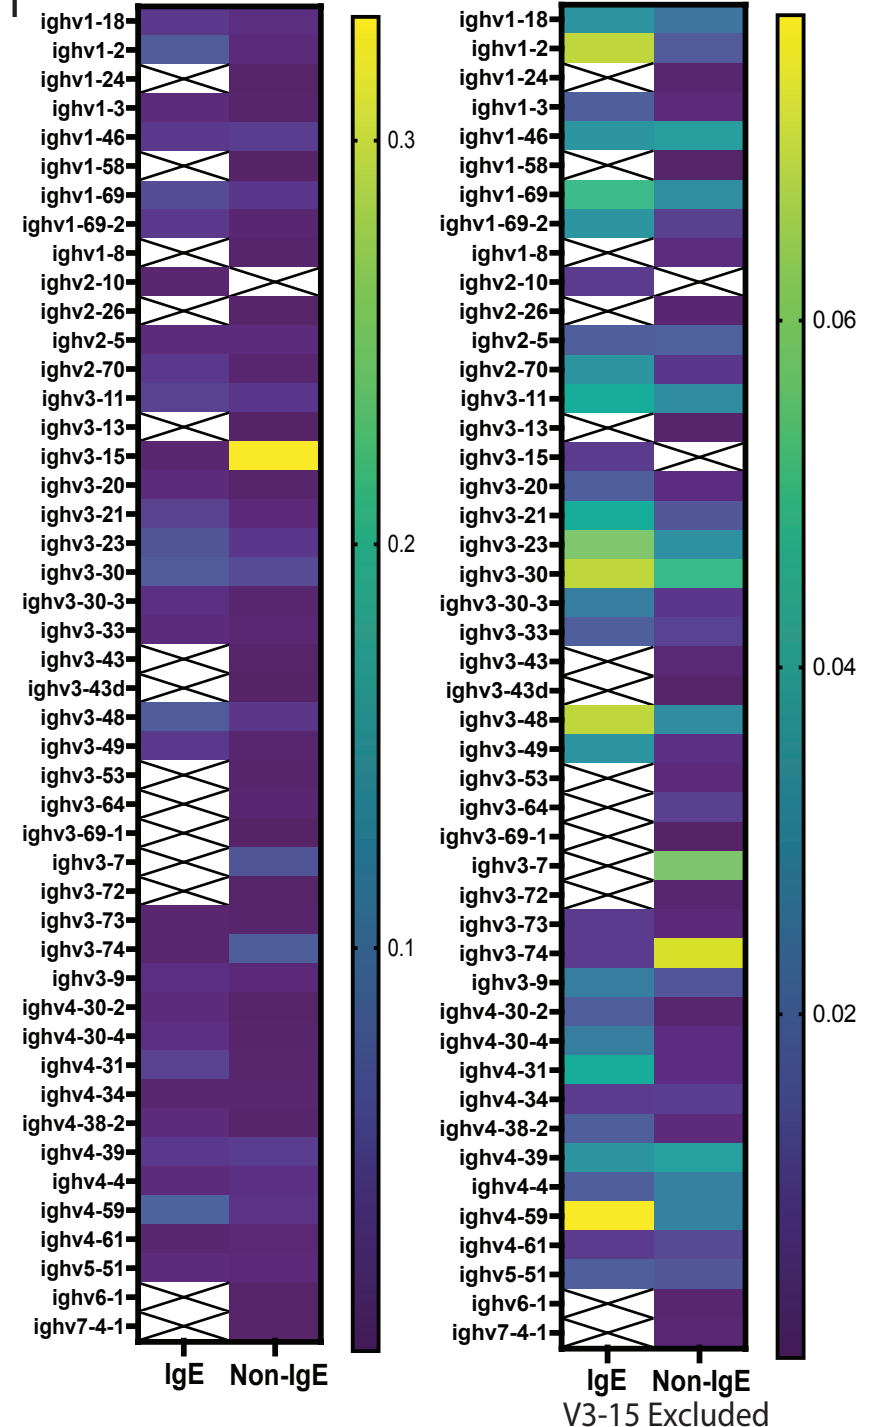

# Supplementary Figure 2

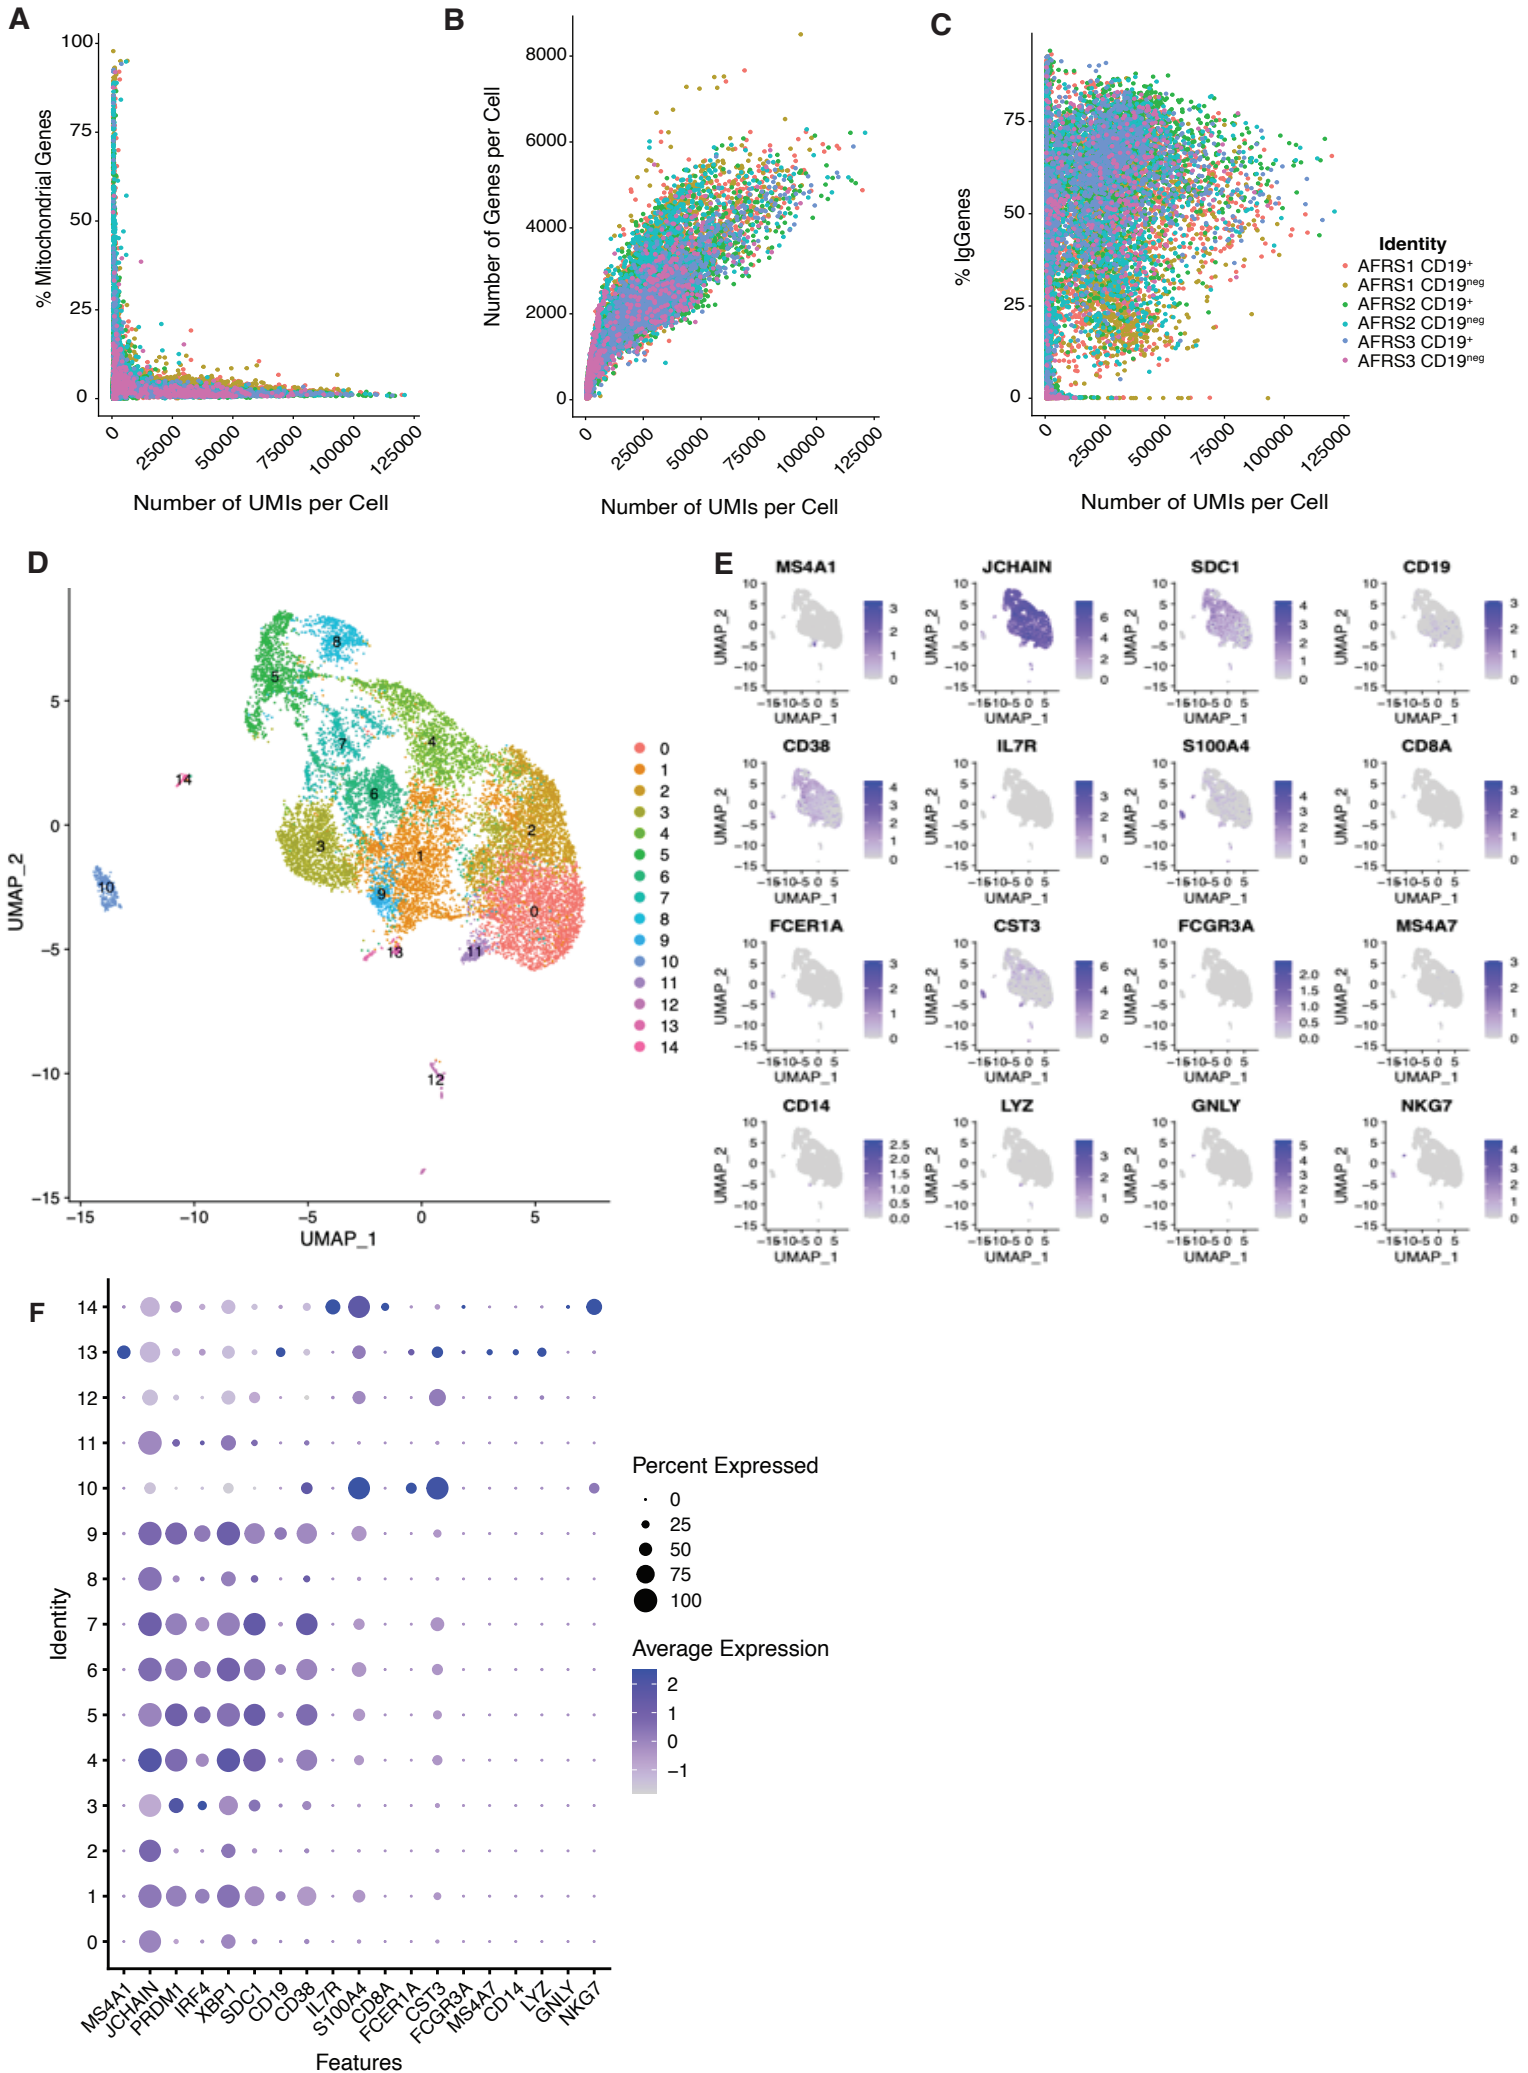

# Supplementary Figure 3

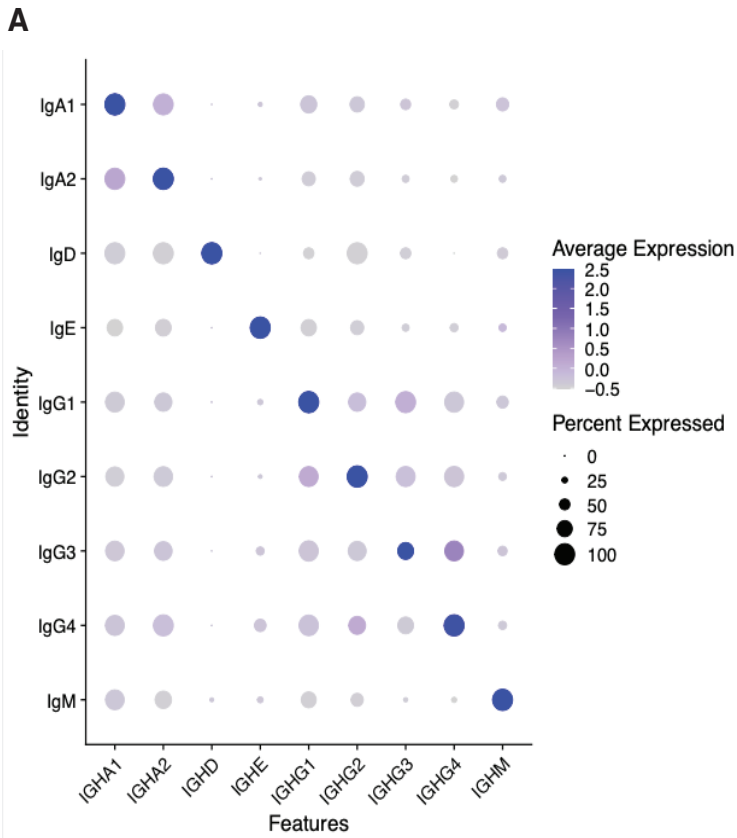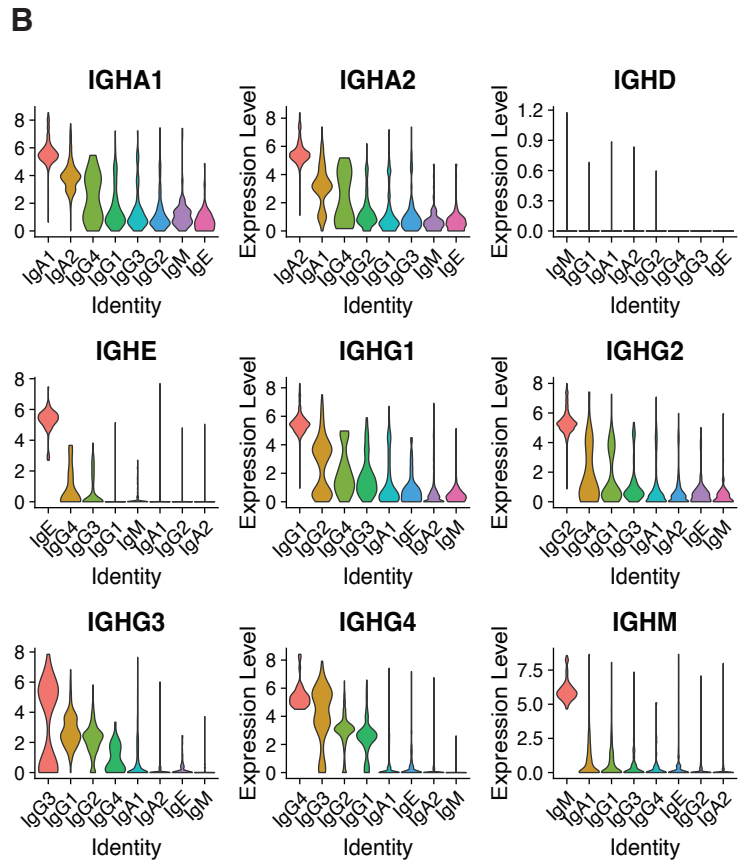

# Supplementary Figure 4

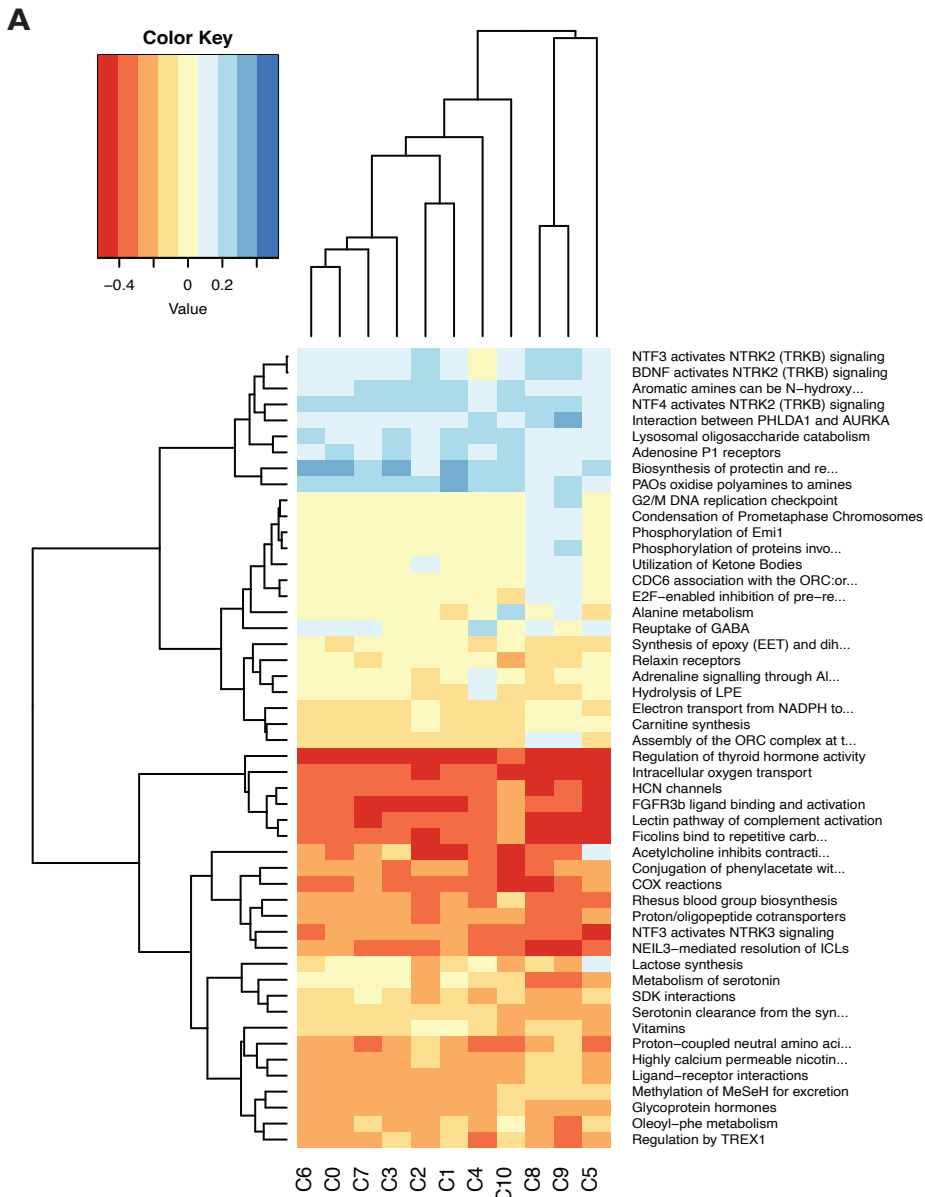

# Supplementary Figure 5

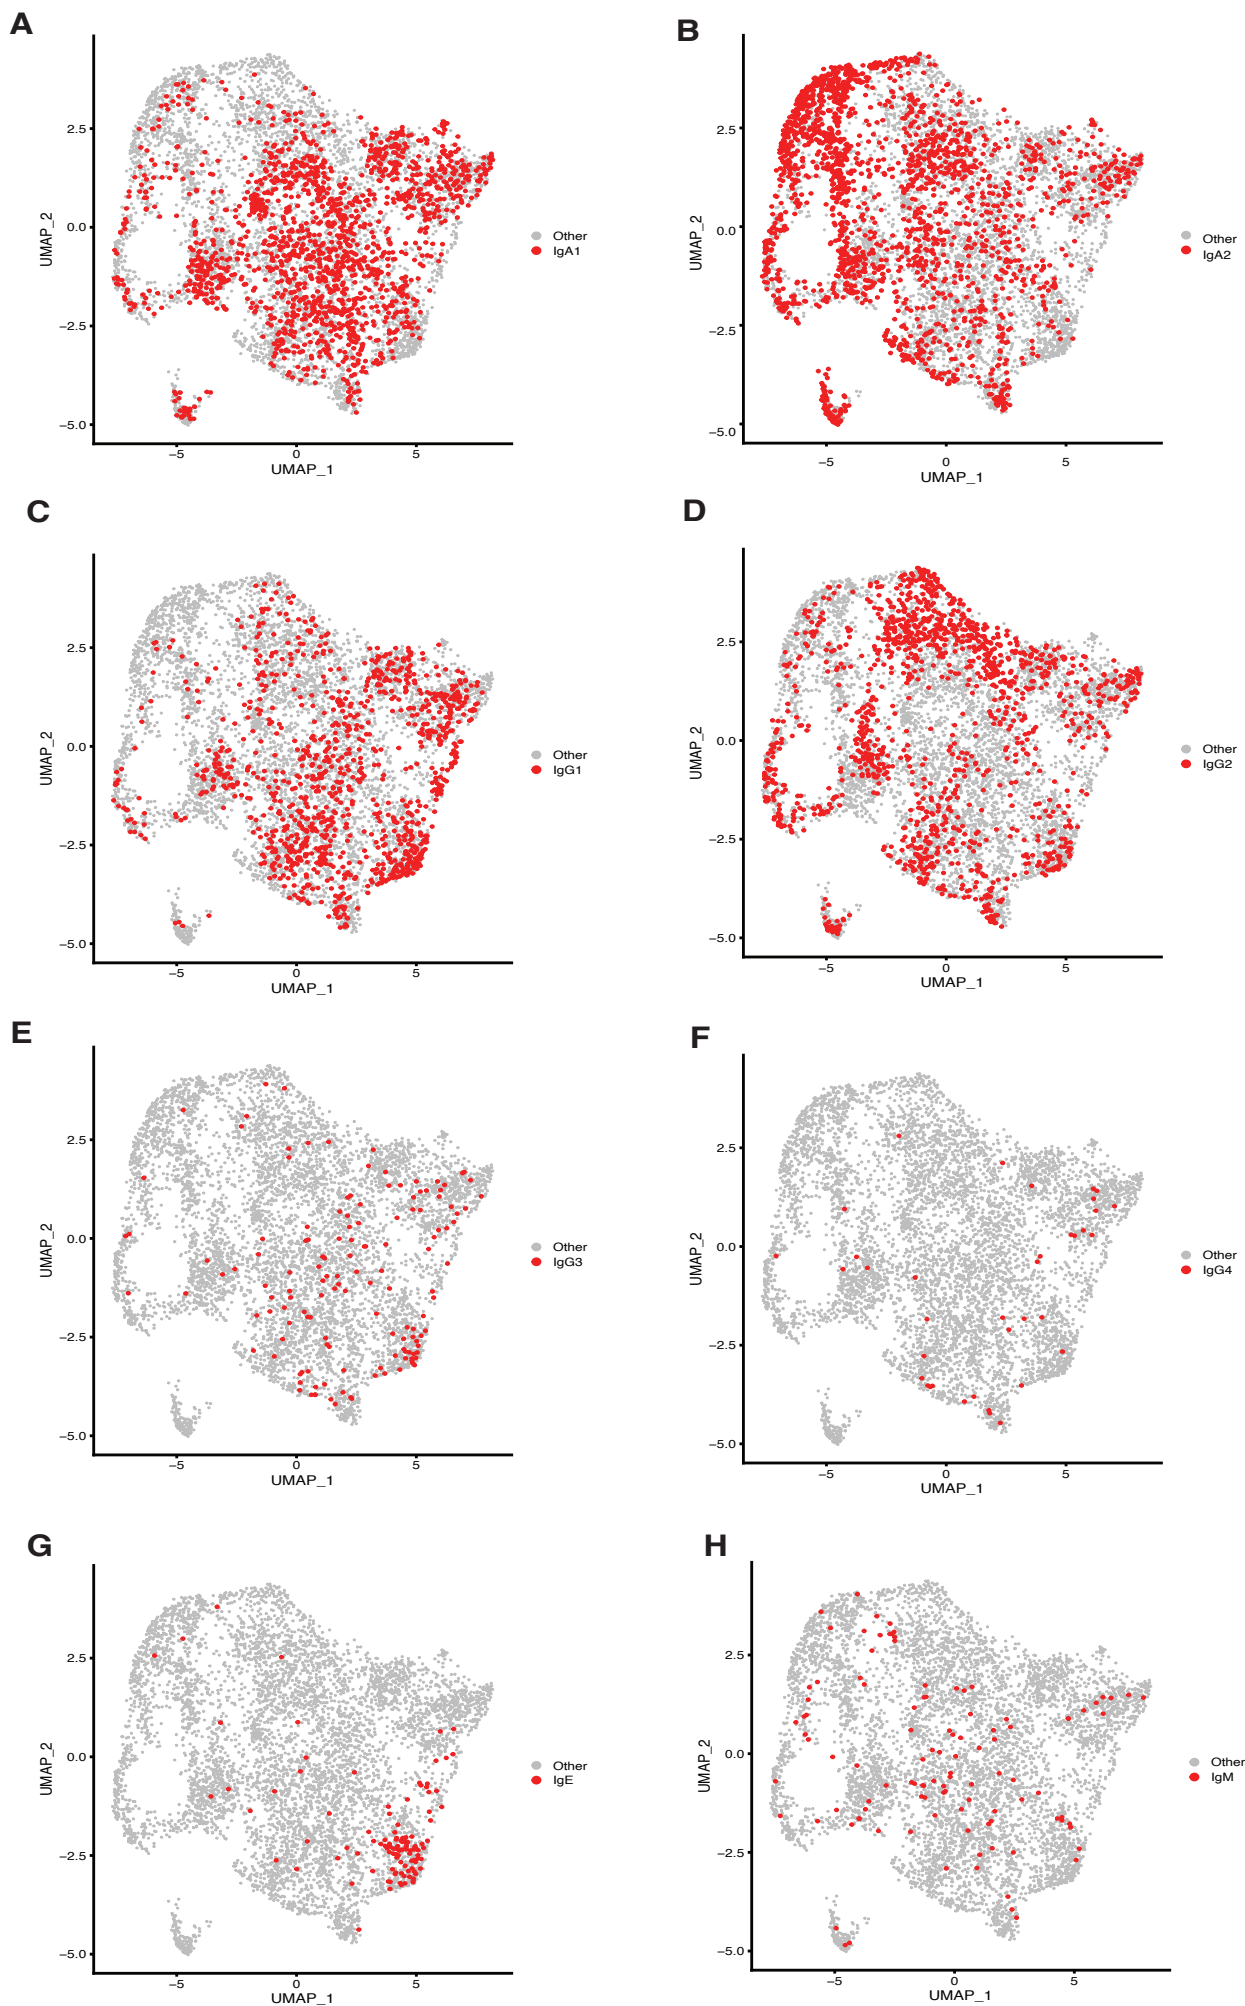

Supplement: NIHMS2005427-supplement-Supplement_1.pdf [file NIHMS2005427-supplement-Supplement_1.pdf]
